# Supplementary material for: A LC-MS/MS method for simultaneous estimation of a novel anti-diabetic combination of saxagliptin and dapagliflozin using a polarity switch approach: application to in vivo rat pharmacokinetic study
Source: Royal Society of Chemistry journal article supplement (doi:10.1039/c8ay02087f), 2018-11-16

**Fig. S1:** The chemical structure of (a) SAX and (b) DAP.

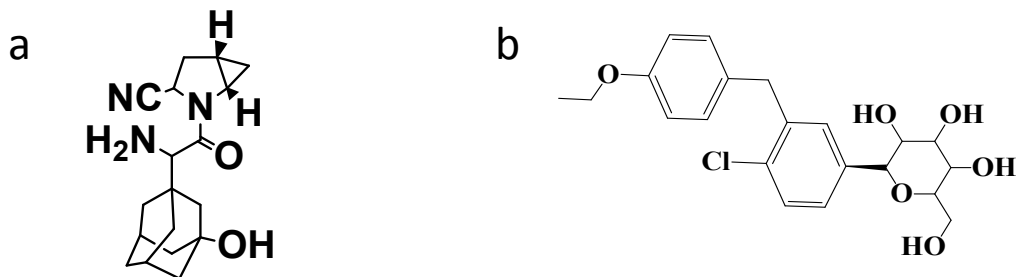

**Fig. S2:** Representative chromatograms of (a) Blank plasma sample of SAX (left) and IS1 (right), (b) Zero calibrator of SAX, (c) Blank plasma sample of DAP (left) and IS2 (right), (d) Zero calibrator of DAP.

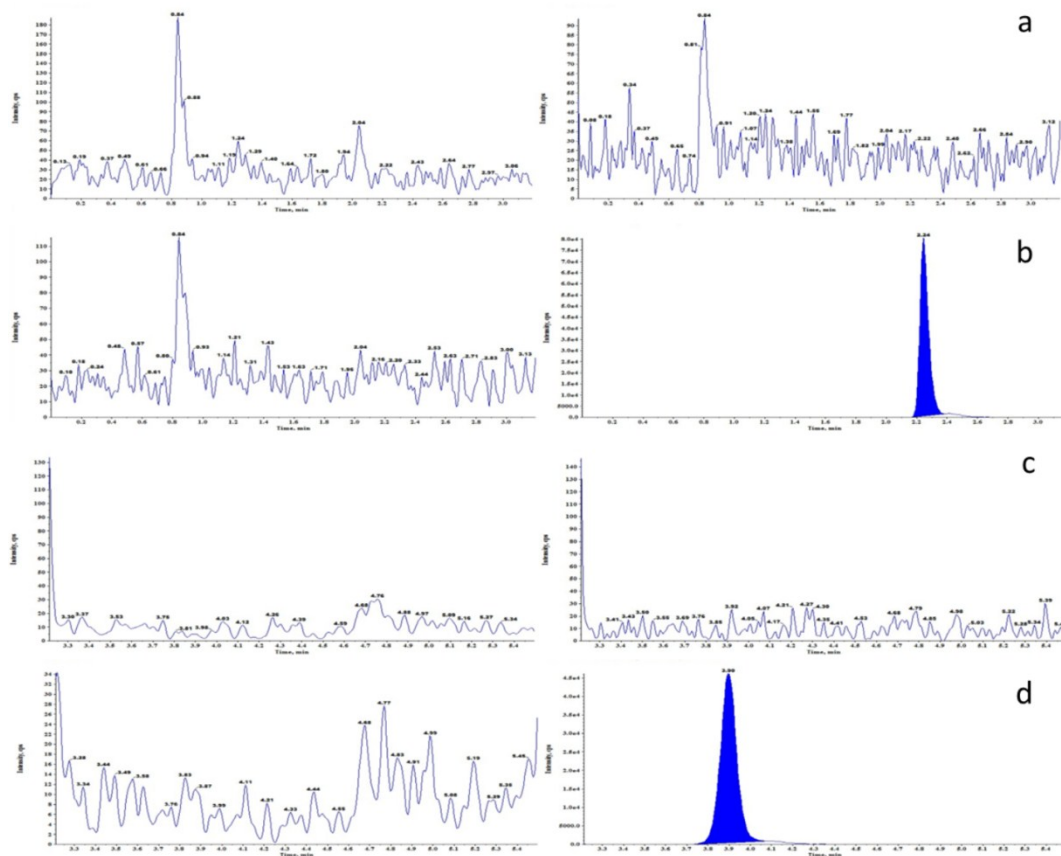

Supplement: c8ay02087f1.pdf [file c8ay02087f1.pdf]
